# Supplementary material
Source: PubMed Central journal article supplement (PMC4391626)

SHERRY MM, REEVES A, WU JK, COCHRAN BH. SUPPLEMENTARY FIG 1 TOP

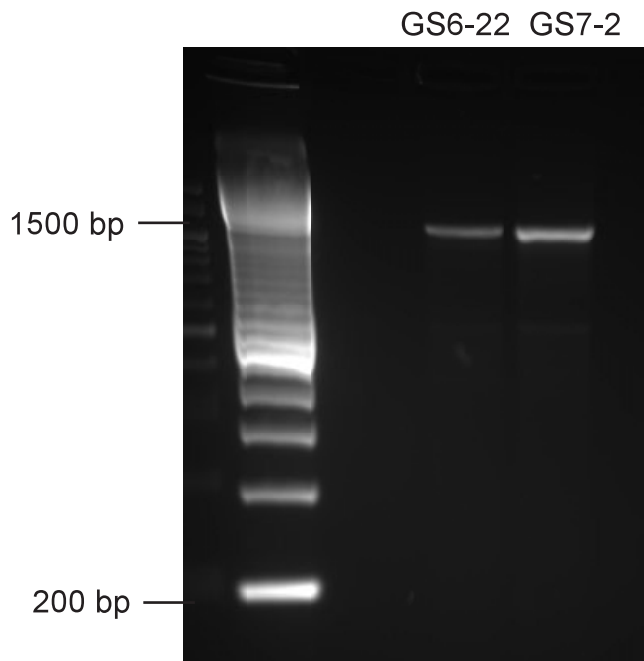

Supplement: NIHMS366815-supplement-Supp_Fig_S1.pdf [file NIHMS366815-supplement-Supp_Fig_S1.pdf]

A.

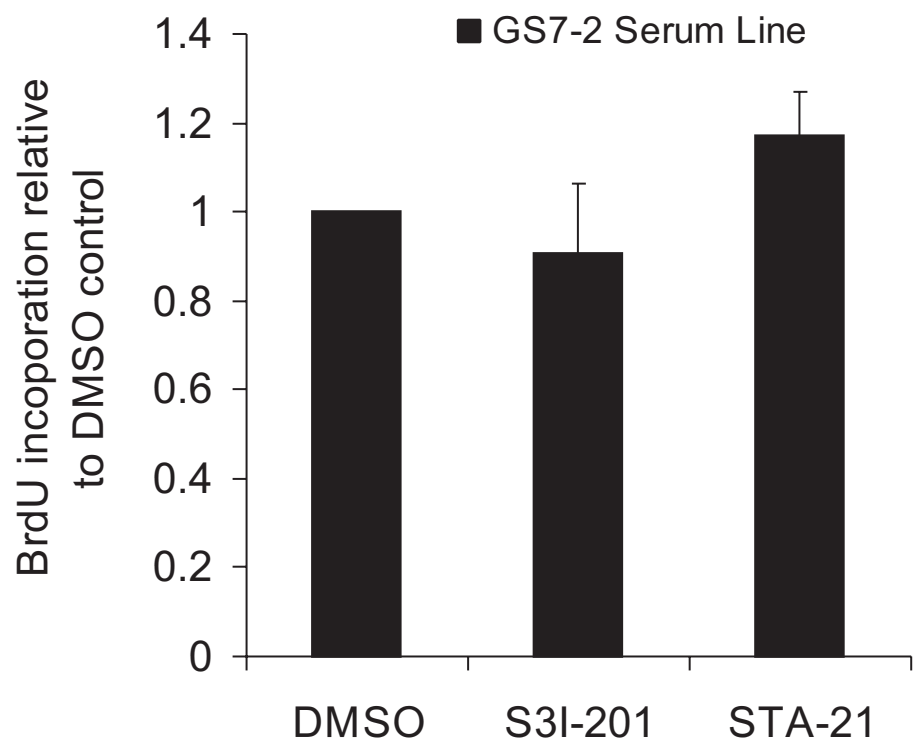

B.

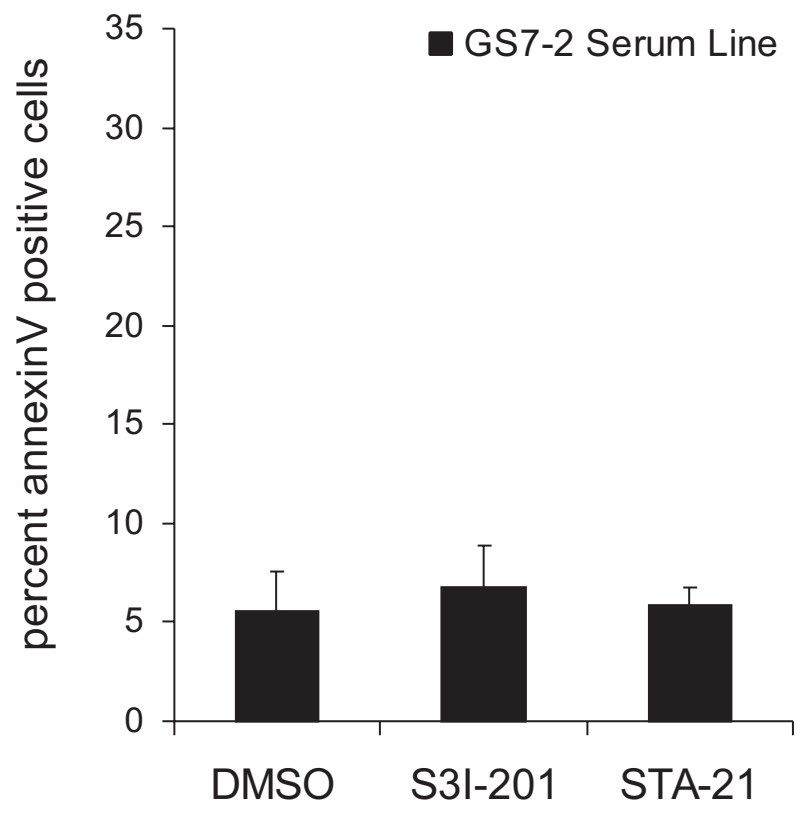

Supplement: NIHMS366815-supplement-Supp_Fig_S10.pdf [file NIHMS366815-supplement-Supp_Fig_S10.pdf]

SHERRY MM, REEVES A, WU JK, COCHRAN BH. SUPPLEMENTARY FIGURE 11 TOP

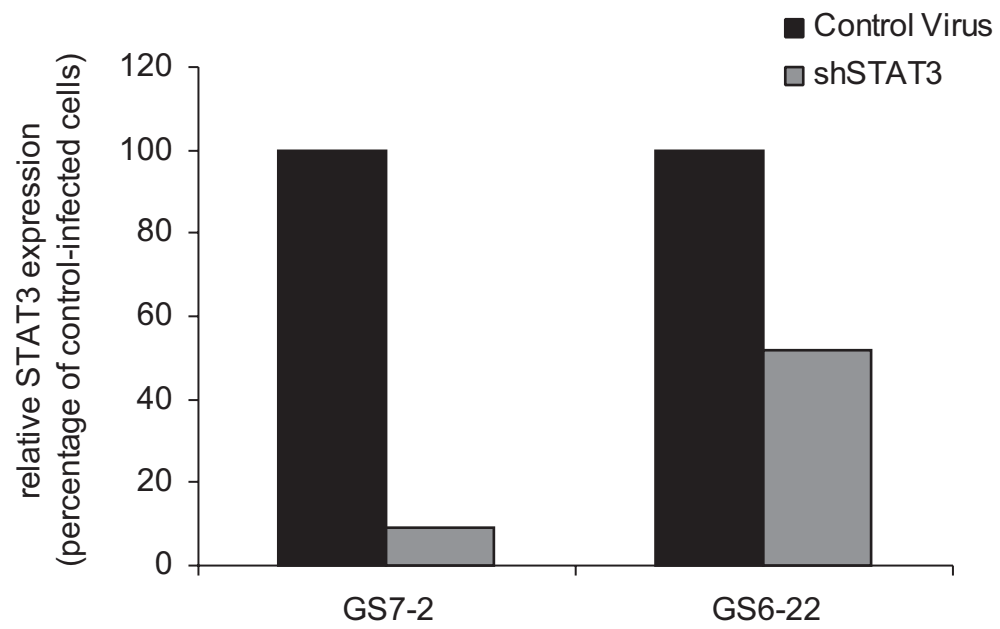

Supplement: NIHMS366815-supplement-Supp_Fig_S11.pdf [file NIHMS366815-supplement-Supp_Fig_S11.pdf]

SHERRY MM, REEVES A, WU JK, COCHRAN BH. SUPPLEMENTARY FIGURE 12 TOP

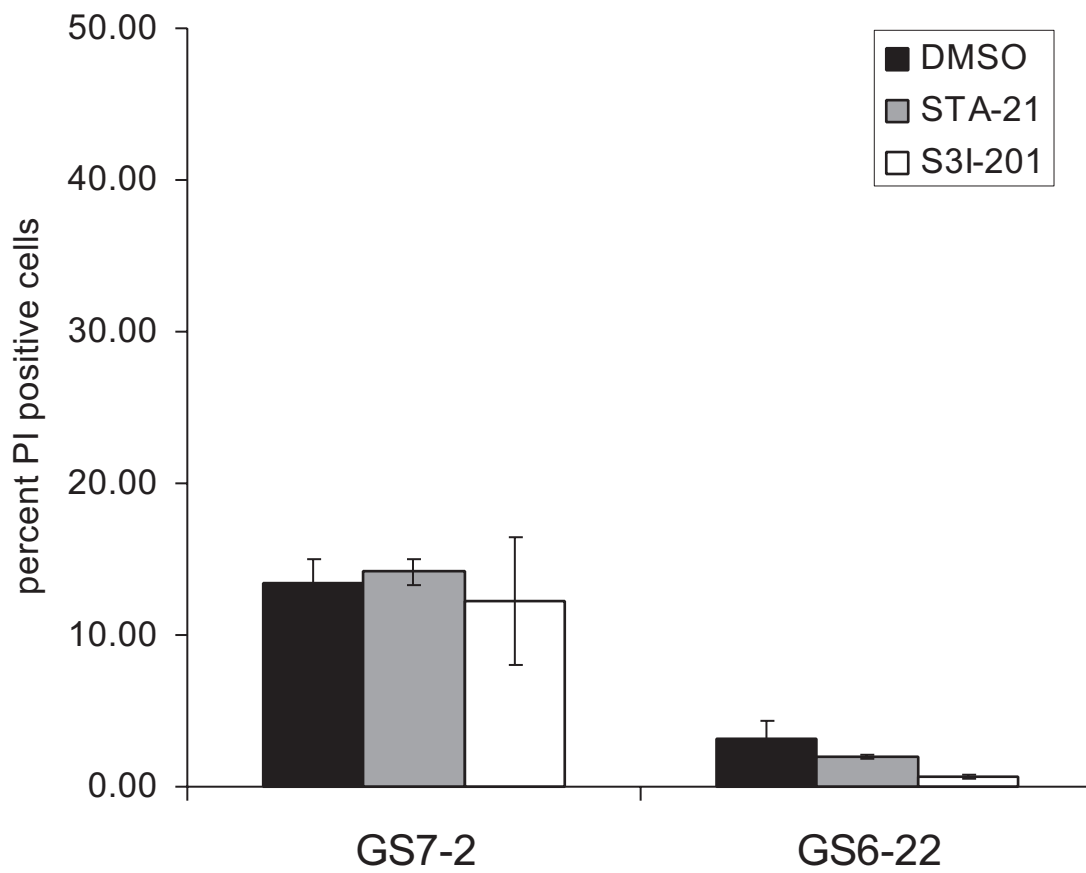

Supplement: NIHMS366815-supplement-Supp_Fig_S12.pdf [file NIHMS366815-supplement-Supp_Fig_S12.pdf]

SHERRY MM, REEVES A, WU JK, COCHRAN BH. SUPPLEMENTARY FIGURE 13 TOP

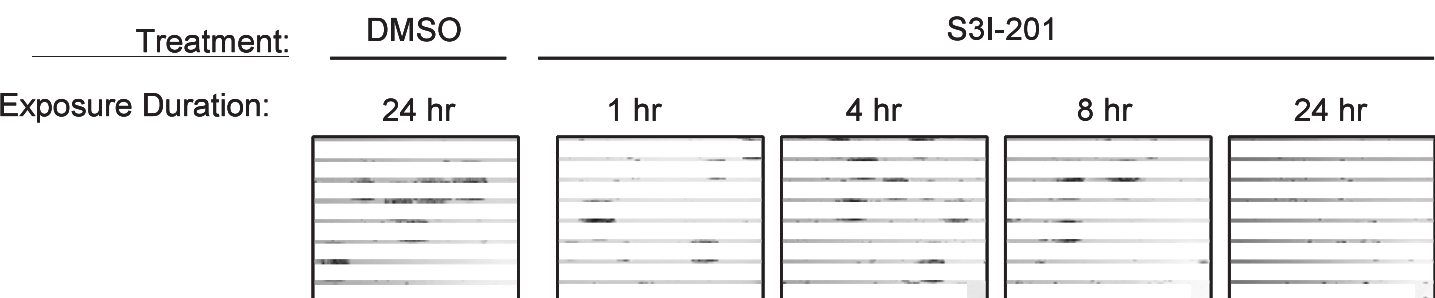

Supplement: NIHMS366815-supplement-Supp_Fig_S13.pdf [file NIHMS366815-supplement-Supp_Fig_S13.pdf]

SHERRY MS, REEVES A, WU JK, COCHRAN BH. SUPPLEMENTARY FIG 14 TOP

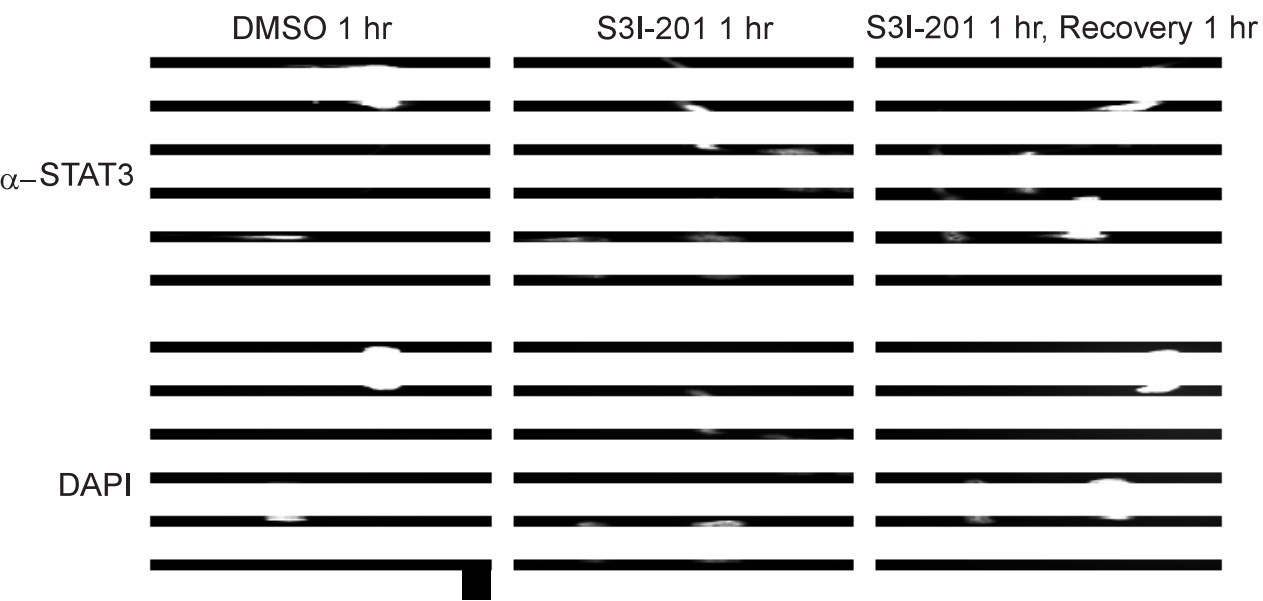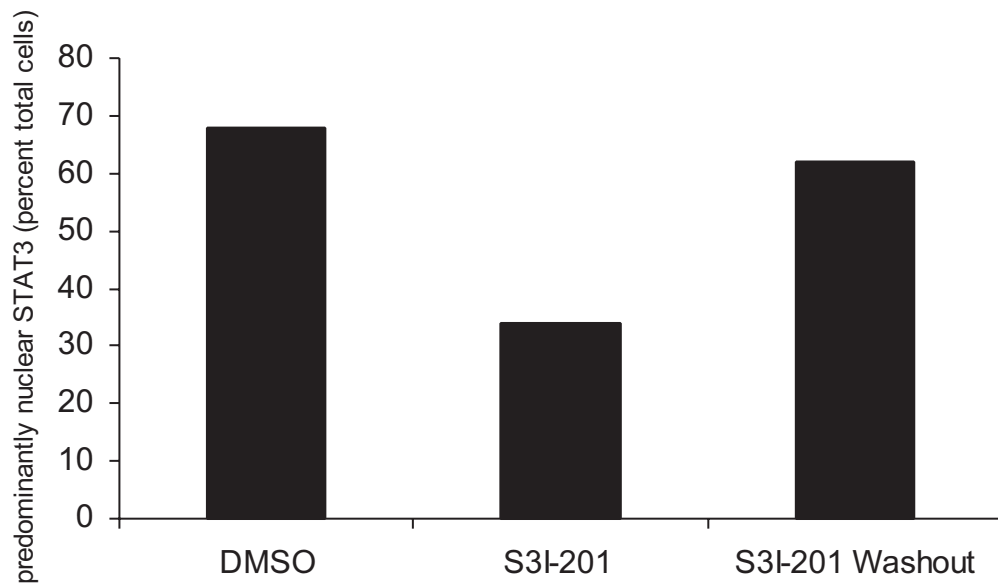

Supplement: NIHMS366815-supplement-Supp_Fig_S14.pdf [file NIHMS366815-supplement-Supp_Fig_S14.pdf]

SHERRY MM, REEVES A, WU JK, COCHRAN BH. SUPPLEMENTARY FIGURE 2 TOP

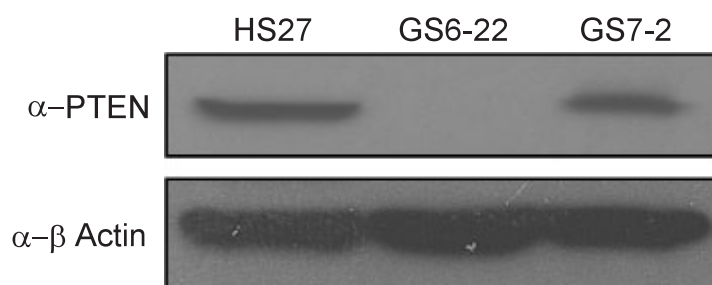

Supplement: NIHMS366815-supplement-Supp_Fig_S2.pdf [file NIHMS366815-supplement-Supp_Fig_S2.pdf]

SHERRY MM, REEVES A, WU JK, COCHRAN BH. SUPPLEMENTARY FIGURE 3 TOP

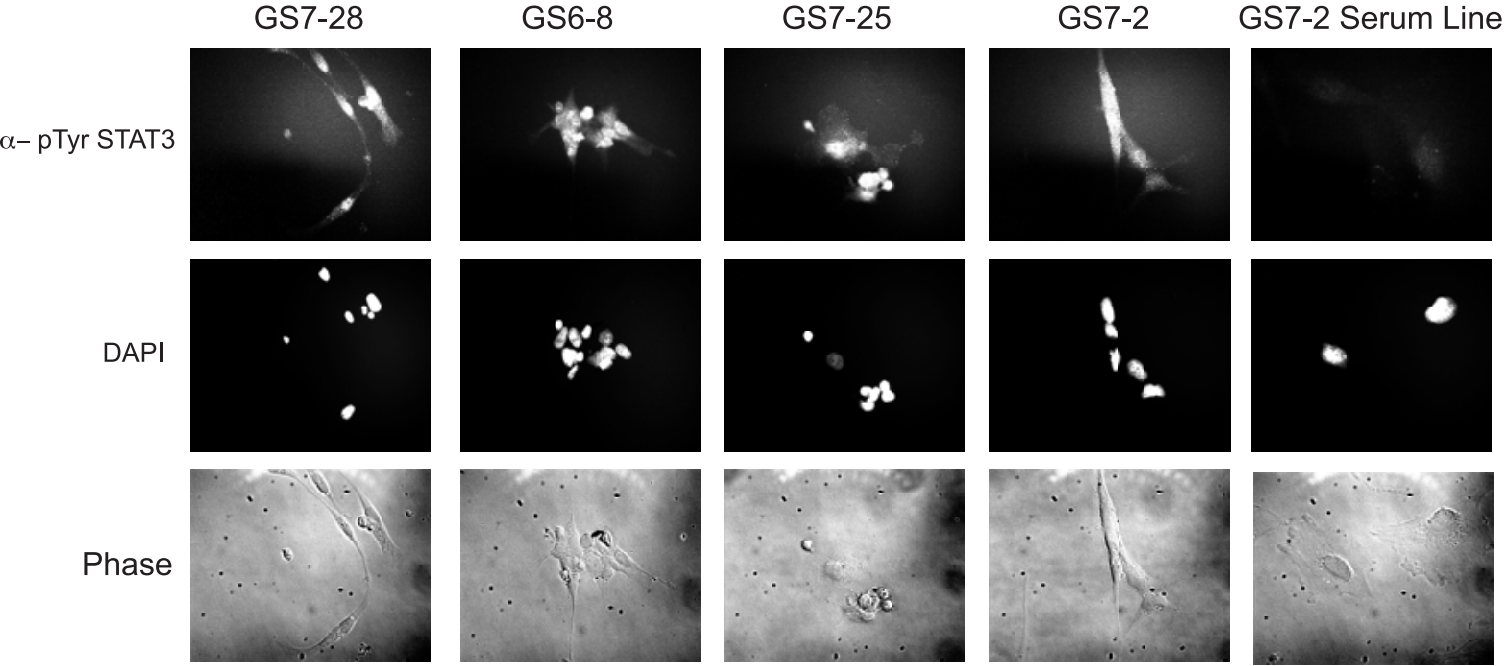

Supplement: NIHMS366815-supplement-Supp_Fig_S3.pdf [file NIHMS366815-supplement-Supp_Fig_S3.pdf]

SHERRY MM, REEVES A, WU JK, COCHRAN BH. SUPPLEMENTARY FIGURE 4 TOP

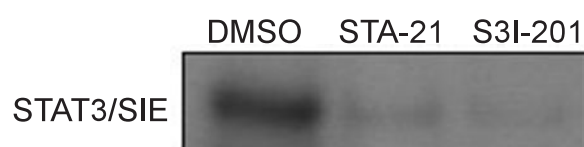

Supplement: NIHMS366815-supplement-Supp_Fig_S4.pdf [file NIHMS366815-supplement-Supp_Fig_S4.pdf]

SHERRY MM, REEVES A, WU JK, COCHRAN BH. SUPPLEMENTARY FIGURE 5 TOP

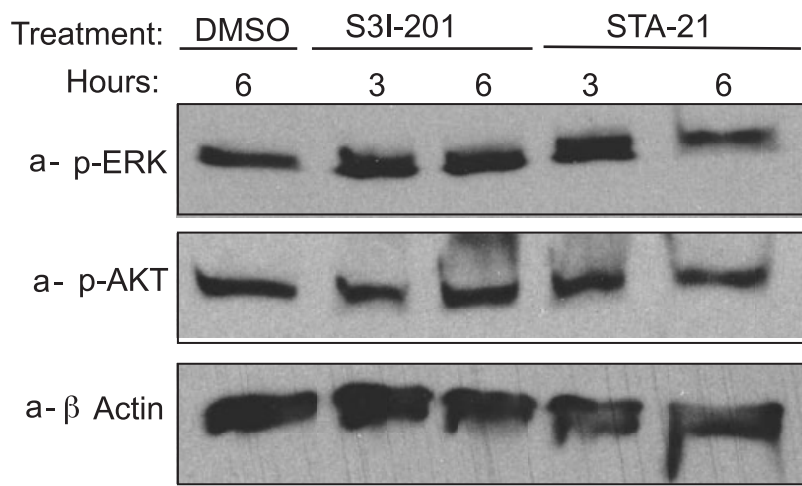

Supplement: NIHMS366815-supplement-Supp_Fig_S5.pdf [file NIHMS366815-supplement-Supp_Fig_S5.pdf]

SHERRY MM, REEVES A, WU JK, COCHRAN BH. SUPPLEMENTARY FIGURE 6 TOP

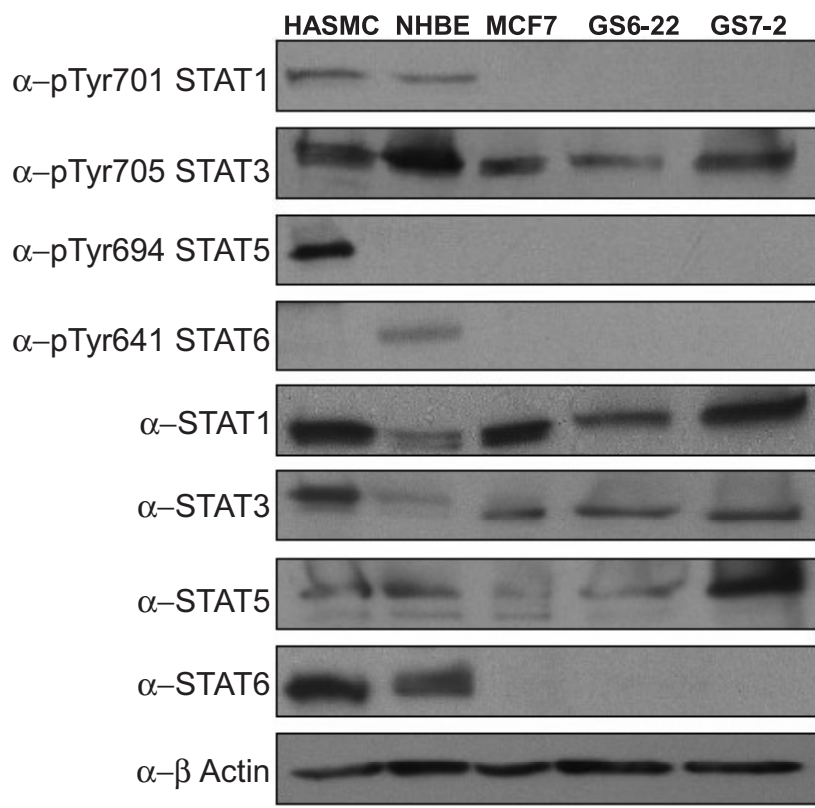

Supplement: NIHMS366815-supplement-Supp_Fig_S6.pdf [file NIHMS366815-supplement-Supp_Fig_S6.pdf]

A.

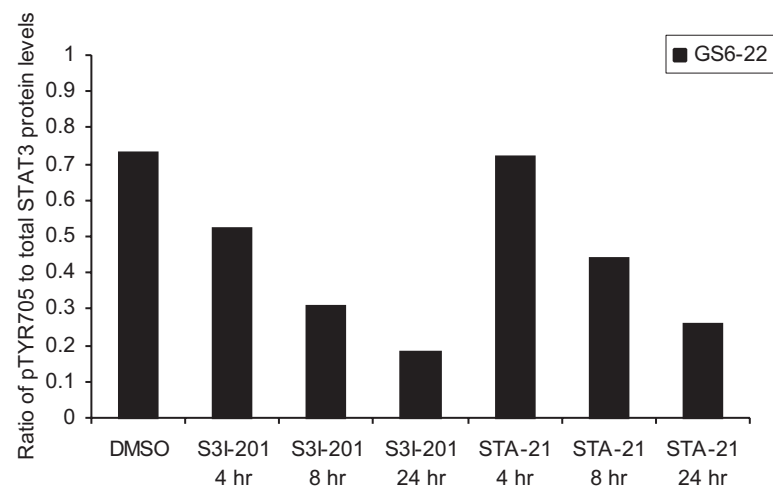

B.

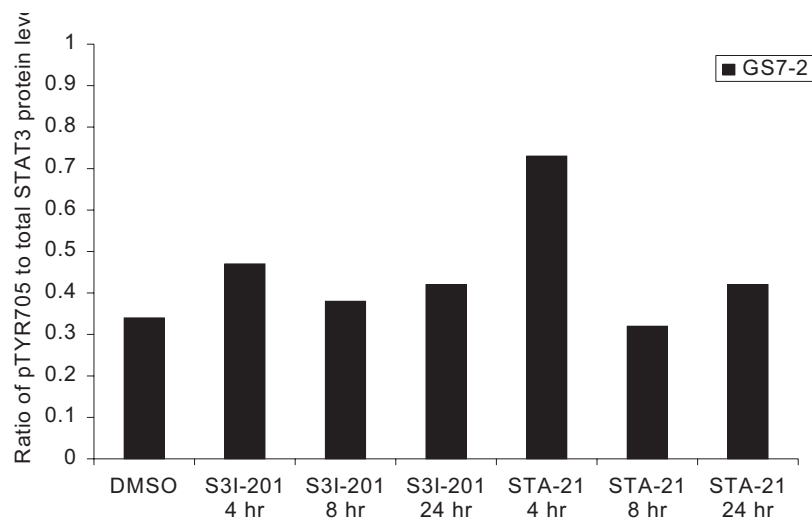

Supplement: NIHMS366815-supplement-Supp_Fig_S7.pdf [file NIHMS366815-supplement-Supp_Fig_S7.pdf]

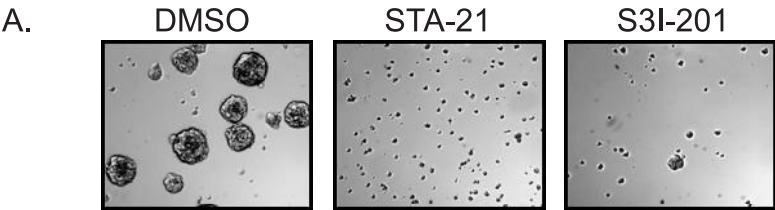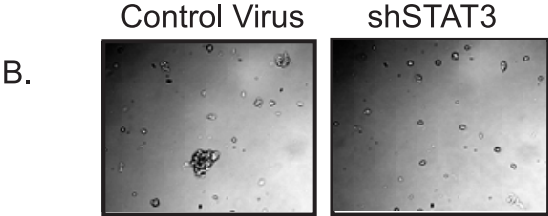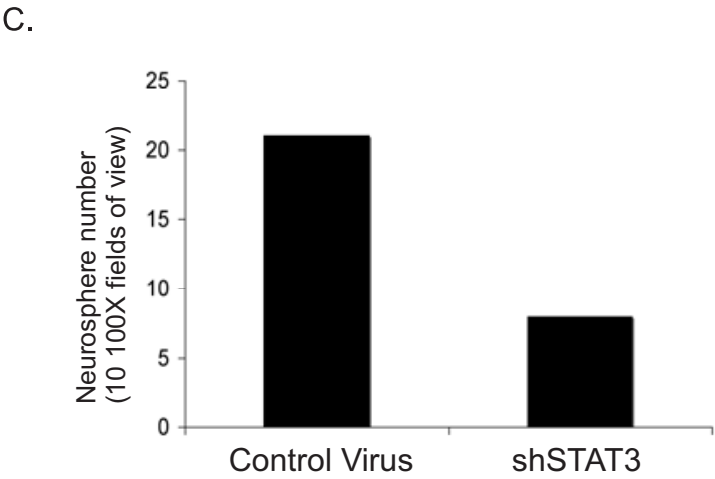

Supplement: NIHMS366815-supplement-Supp_Fig_S8.pdf [file NIHMS366815-supplement-Supp_Fig_S8.pdf]

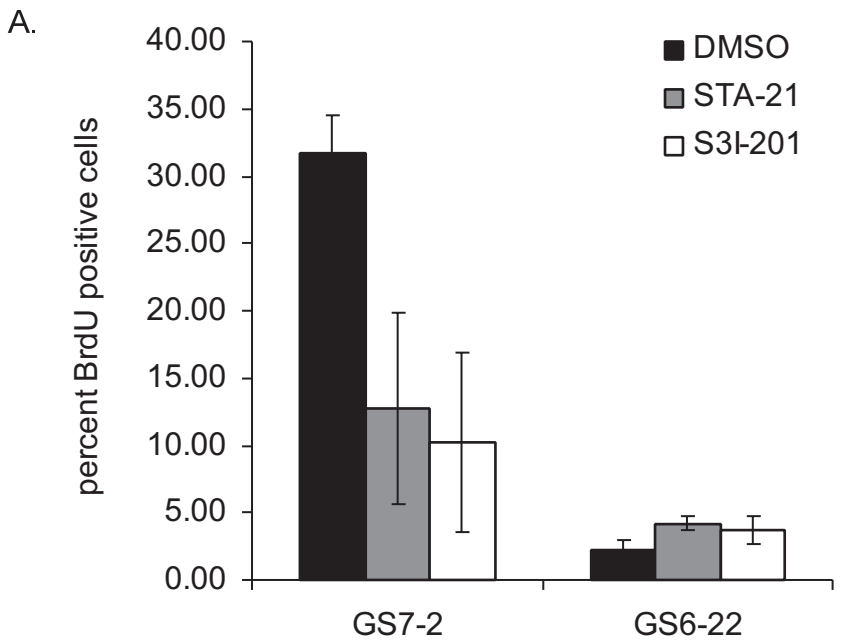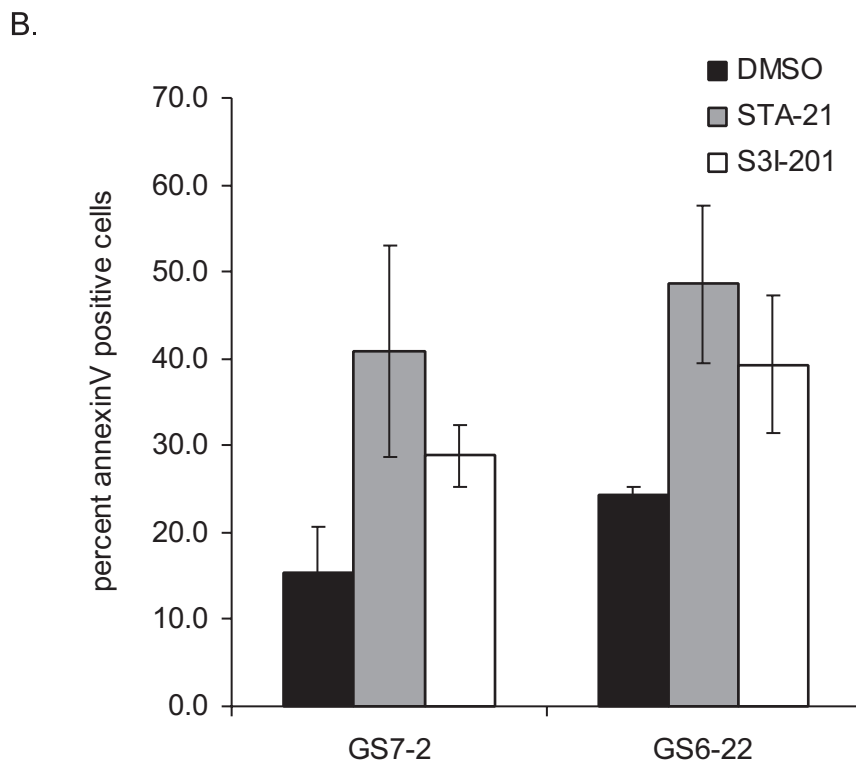

Supplement: NIHMS366815-supplement-Supp_Fig_S9.pdf [file NIHMS366815-supplement-Supp_Fig_S9.pdf]
